# Supplementary material for: Identification and Alternative Splicing Profile of the Raffinose synthase Gene in Grass Species
Source: MDPI journal article supplement (doi:10.3390/ijms241311120), 2023-07-05
Supplement: s1 [file s1]

Table S1. *Rafs* genes identified from 10 plant species.

| Plant species                  | Common name        | No. of sequences identified | Sequence ID                                                                                                                                                                |
|--------------------------------|--------------------|-----------------------------|----------------------------------------------------------------------------------------------------------------------------------------------------------------------------|
| <i>Brachypodium distachyon</i> | Purple false brome | 5                           | Bradi3g39220<br>Bradi1g54210<br>Bradi1g48050<br>Bradi5g13570<br>Bradi2g04310                                                                                               |
| <i>Brachypodium stacei</i>     | *                  | 5                           | Brast03G265700<br>Brast06G177200<br>Brast07G049600<br>Brast09G120600<br>Brast01G370300                                                                                     |
| <i>Oropetium thomaeum</i>      | *                  | 6                           | Oropetium_20150105_20308A<br>Oropetium_20150105_26753A<br>Oropetium_20150105_17382A<br>Oropetium_20150105_17380A<br>Oropetium_20150105_04775A<br>Oropetium_20150105_07232A |
| <i>Oryza sativa</i>            | Rice               | 6                           | LOC_Os08g38710<br>LOC_Os07g10840<br>LOC_Os06g07600<br>LOC_Os04g40520<br>LOC_Os03g59430<br>LOC_Os01g07530                                                                   |
| <i>Panicum hallii</i>          | Hall's panicgrass  | 7                           | Pahal.6G249100<br>Pahal.9G040600<br>Pahal.2G094000<br>Pahal.4G310000<br>Pahal.4G309700<br>Pahal.7G192100<br>Pahal.5G489000                                                 |
| <i>Panicum virgatum</i>        | Switchgrass        | 16                          | Pavir.6KG336200<br>Pavir.6KG338200<br>Pavir.3NG191300<br>Pavir.7NG251200<br>Pavir.9NG061500<br>Pavir.2NG127100<br>Pavir.4KG067600<br>Pavir.4KG086000<br>Pavir.2KG440200    |

|                         |                |   |                                                                                                                                          |
|-------------------------|----------------|---|------------------------------------------------------------------------------------------------------------------------------------------|
|                         |                |   | Pavir.7KG206700<br>Pavir.7NG230500<br>Pavir.4KG068000<br>Pavir.5KG072800<br>Pavir.5NG075200<br>Pavir.5NG070900<br>Pavir.J666000          |
| <i>Setaria italica</i>  | Foxtail millet | 7 | Seita.6G195300<br>Seita.9G043300<br>Seita.2G081000<br>Seita.4G057000<br>Seita.4G056900<br>Seita.7G139800<br>Seita.5G119800               |
| <i>Setaria viridis</i>  | Green foxtail  | 7 | Sevir.6G202600<br>Sevir.9G042600<br>Sevir.2G084500<br>Sevir.4G054800<br>Sevir.4G054700<br>Sevir.7G148900<br>Sevir.5G116500               |
| <i>Sorghum bicolor</i>  | Sorghum        | 7 | Sobic.007G219900<br>Sobic.001G044800<br>Sobic.002G075800<br>Sobic.010G057300<br>Sobic.010G057400<br>Sobic.006G122400<br>Sobic.003G052300 |
| <i>Zea mays Ensembl</i> | Maize          | 7 | GRMZM2G037265<br>GRMZM2G050177<br>GRMZM2G340656<br>GRMZM2G077181<br>GRMZM2G127147<br>GRMZM2G150906<br>GRMZM2G047292                      |

Table S2. Predicted subcellular localization of plant Rafs proteins.

| Species                        | Common name        | Sequence ID               | Start(bp) | End(bp)  | Exon number | Genome length(bp) | Location                       | Protein length | Subcellular locations |
|--------------------------------|--------------------|---------------------------|-----------|----------|-------------|-------------------|--------------------------------|----------------|-----------------------|
| <i>Brachypodium distachyon</i> | Purple false brome | Bradi3g39220              | 41325620  | 41330075 | 12          | 4456              | Bd3                            | 764            | Chloroplast           |
|                                |                    | Bradi1g54210              | 52770572  | 52774678 | 6           | 4107              | Bd1                            | 760            | Chloroplast           |
|                                |                    | Bradi1g48050              | 46832049  | 46835295 | 4           | 3247              | Bd1                            | 843            | Chloroplast           |
|                                |                    | Bradi5g13570              | 17234227  | 17238371 | 14          | 4145              | Bd5                            | 817            | Chloroplast           |
|                                |                    | Bradi2g04310              | 3048386   | 3051526  | 2           | 3141              | Bd2                            | 782            | Chloroplast           |
| <i>Brachypodium stacei</i>     | *                  | Brast03G265700            | 22730251  | 22734699 | 13          | 4449              | Chr03                          | 759            | Chloroplast           |
|                                |                    | Brast06G177200            | 16256632  | 16260522 | 6           | 3891              | Chr06                          | 763            | Chloroplast           |
|                                |                    | Brast07G049600            | 2848079   | 2851208  | 4           | 3130              | Chr07                          | 838            | Chloroplast           |
|                                |                    | Brast09G120600            | 11340548  | 11344725 | 14          | 4178              | Chr09                          | 826            | Chloroplast           |
|                                |                    | Brast01G370300            | 27535251  | 27538468 | 2           | 3218              | Chr01                          | 793            | Chloroplast           |
| <i>Oryza sativa</i>            | Japanese Rice      | LOC_Os08g38710            | 24475146  | 24479529 | 13          | 4384              | Chr8                           | 753            | Chloroplast           |
|                                |                    | LOC_Os07g10840            | 5890558   | 5894135  | 7           | 3578              | Chr7                           | 763            | Chloroplast           |
|                                |                    | LOC_Os06g07600            | 3675572   | 3679002  | 6           | 3431              | Chr6                           | 841            | Chloroplast           |
|                                |                    | LOC_Os04g40520            | 24068037  | 24072124 | 14          | 4088              | Chr4                           | 738            | Cytoplasmic           |
|                                |                    | LOC_Os03g59430            | 33829500  | 33834198 | 7           | 4699              | Chr3                           | 505            | Cytoplasmic           |
|                                |                    | LOC_Os01g07530            | 3598418   | 3602211  | 2           | 3794              | Chr1                           | 840            | Chloroplast           |
| <i>Oropetium thomaeum</i>      | *                  | Oropetium_20150105_20308A | 394209    | 398399   | 12          | 4191              | Oropetium_genomic_20141112_068 | 796            | Chloroplast           |
|                                |                    | Oropetium_20150105_26753A | 21626     | 25880    | 9           | 4255              | Oropetium_genomic_20141112_162 | 780            | Chloroplast           |
|                                |                    | Oropetium_20150105_17382A | 1599430   | 1602703  | 6           | 3274              | Oropetium_genomic_20141112_046 | 763            | Chloroplast           |
|                                |                    | Oropetium_20150105_17380A | 1593581   | 1596610  | 6           | 3030              | Oropetium_genomic_20141112_046 | 752            | Chloroplast           |

|                                |                   |                           |          |          |    |      |                                |     |             |
|--------------------------------|-------------------|---------------------------|----------|----------|----|------|--------------------------------|-----|-------------|
|                                |                   | Oropetium_20150105_04775A | 439549   | 442205   | 3  | 2657 | Oropetium_genomic_20141112_003 | 759 | Cytoplasmic |
|                                |                   | Oropetium_20150105_07232A | 2334833  | 2337593  | 2  | 2761 | Oropetium_genomic_20141112_014 | 784 | Chloroplast |
| <b><i>Panicum hallii</i></b>   | Hall's panicgrass | Pahal.6G249100            | 41223928 | 41228643 | 13 | 4716 | Chr06                          | 753 | Cytoplasmic |
|                                |                   | Pahal.9G040600            | 2250671  | 2255416  | 10 | 4746 | Chr09                          | 766 | Cytoplasmic |
|                                |                   | Pahal.2G094000            | 7086625  | 7090709  | 5  | 4085 | Chr02                          | 770 | Cytoplasmic |
|                                |                   | Pahal.4G310000            | 49525471 | 49529836 | 7  | 4366 | Chr04                          | 863 | Chloroplast |
|                                |                   | Pahal.4G309700            | 49506203 | 49509327 | 6  | 3125 | Chr04                          | 764 | Chloroplast |
|                                |                   | Pahal.7G192100            | 37837014 | 37841211 | 14 | 4198 | Chr07                          | 806 | Chloroplast |
|                                |                   | Pahal.5G489000            | 55995024 | 55998693 | 2  | 3670 | Chr05                          | 786 | Chloroplast |
| <b><i>Panicum virgatum</i></b> | Switchgrass       | Pavir.6KG336200           | 64586278 | 64590416 | 13 | 4139 | Chr06K                         | 752 | Cytoplasmic |
|                                |                   | Pavir.6KG338200           | 64734106 | 64738224 | 13 | 4119 | Chr06K                         | 753 | Cytoplasmic |
|                                |                   | Pavir.3NG191300           | 35551910 | 35556245 | 13 | 4336 | Chr03N                         | 753 | Cytoplasmic |
|                                |                   | Pavir.7NG251200           | 47574333 | 47579250 | 10 | 4918 | Chr07N                         | 760 | Cytoplasmic |
|                                |                   | Pavir.9NG061500           | 3912768  | 3917385  | 10 | 4618 | Chr09N                         | 761 | Cytoplasmic |
|                                |                   | Pavir.2NG127100           | 19121861 | 19125008 | 4  | 3148 | Chr02N                         | 757 | Cytoplasmic |
|                                |                   | Pavir.4KG067600           | 6701727  | 6705531  | 7  | 3805 | Chr04K                         | 871 | Chloroplast |
|                                |                   | Pavir.4KG086000           | 8194685  | 8197891  | 6  | 3207 | Chr04K                         | 767 | Chloroplast |
|                                |                   | Pavir.2KG440200           | 78497128 | 78500277 | 3  | 3150 | Chr02K                         | 595 | Periplasmic |
|                                |                   | Pavir.7KG206700           | 51526138 | 51530319 | 14 | 4182 | Chr07K                         | 801 | Chloroplast |
|                                |                   | Pavir.7NG230500           | 49405119 | 49409124 | 14 | 4006 | Chr07N                         | 767 | Cytoplasmic |
|                                |                   | Pavir.4KG068000           | 6732371  | 6736022  | 5  | 3652 | Chr04K                         | 643 | Cytoplasmic |
|                                |                   | Pavir.5KG072800           | 9143696  | 9147501  | 2  | 3806 | Chr05K                         | 785 | Chloroplast |
|                                |                   | Pavir.5NG075200           | 8630083  | 8633983  | 2  | 3901 | Chr05N                         | 784 | Chloroplast |
|                                |                   | Pavir.5NG070900           | 8364401  | 8368341  | 2  | 3941 | Chr05N                         | 784 | Chloroplast |

|                                |                |                  |           |           |    |      |               |     |             |
|--------------------------------|----------------|------------------|-----------|-----------|----|------|---------------|-----|-------------|
|                                |                | Pavir.J666000    | 5960      | 7633      | 5  | 1674 | scaffold_6879 | 410 | Cytoplasmic |
| <b><i>Setaria italica</i></b>  | Foxtail millet | Seita.6G195300   | 31734112  | 31738431  | 13 | 4320 | scaffold_6    | 753 | Cytoplasmic |
|                                |                | Seita.9G043300   | 2429736   | 2434322   | 10 | 4587 | scaffold_9    | 766 | Cytoplasmic |
|                                |                | Seita.2G081000   | 7016721   | 7019764   | 3  | 3044 | scaffold_2    | 779 | Cytoplasmic |
|                                |                | Seita.4G057000   | 4220412   | 4224375   | 7  | 3964 | scaffold_4    | 862 | Chloroplast |
|                                |                | Seita.4G056900   | 4212770   | 4216250   | 6  | 3481 | scaffold_4    | 765 | Chloroplast |
|                                |                | Seita.7G139800   | 23049676  | 23054038  | 14 | 4363 | scaffold_7    | 883 | Chloroplast |
|                                |                | Seita.5G119800   | 10053068  | 10056645  | 2  | 3578 | scaffold_5    | 782 | Chloroplast |
| <b><i>Setaria viridis</i></b>  | Green foxtail  | Sevir.6G202600   | 32039498  | 32043922  | 13 | 4425 | Chr_06        | 753 | Cytoplasmic |
|                                |                | Sevir.9G042600   | 2448938   | 2453684   | 10 | 4747 | Chr_09        | 766 | Cytoplasmic |
|                                |                | Sevir.2G084500   | 7280326   | 7283520   | 3  | 3195 | Chr_02        | 779 | Cytoplasmic |
|                                |                | Sevir.4G054800   | 4248784   | 4252921   | 7  | 4138 | Chr_04        | 862 | Chloroplast |
|                                |                | Sevir.4G054700   | 4237703   | 4240951   | 6  | 3249 | Chr_04        | 764 | Chloroplast |
|                                |                | Sevir.7G148900   | 22159303  | 22163694  | 14 | 4392 | Chr_07        | 882 | Chloroplast |
|                                |                | Sevir.5G116500   | 9479721   | 9483530   | 2  | 3810 | Chr_05        | 782 | Chloroplast |
| <b><i>Sorghum bicolor</i></b>  | Sorghum        | Sobic.007G219900 | 64802754  | 64807148  | 13 | 4395 | Chr07         | 754 | Cytoplasmic |
|                                |                | Sobic.001G044800 | 3325484   | 3330705   | 10 | 5222 | Chr01         | 773 | Cytoplasmic |
|                                |                | Sobic.002G075800 | 7874437   | 7878146   | 6  | 3710 | Chr02         | 764 | Chloroplast |
|                                |                | Sobic.010G057300 | 4474788   | 4478602   | 7  | 3815 | Chr10         | 857 | Chloroplast |
|                                |                | Sobic.010G057400 | 4487128   | 4496678   | 7  | 9551 | Chr10         | 738 | Chloroplast |
|                                |                | Sobic.006G122400 | 48852708  | 48856765  | 14 | 4058 | Chr06         | 810 | Chloroplast |
|                                |                | Sobic.003G052300 | 4721513   | 4725477   | 2  | 3965 | Chr03         | 792 | Chloroplast |
| <b><i>Zea mays Ensembl</i></b> | Maize          | GRMZM2G037265    | 183584834 | 183588867 | 13 | 4034 | chr01         | 747 | Chloroplast |
|                                |                | GRMZM2G050177    | 183697224 | 183704114 | 16 | 6891 | chr01         | 922 | Chloroplast |

|  |               |           |           |    |       |       |     |             |
|--|---------------|-----------|-----------|----|-------|-------|-----|-------------|
|  | GRMZM2G340656 | 19063721  | 19083446  | 7  | 19726 | chr07 | 756 | Cytoplasmic |
|  | GRMZM2G077181 | 291025126 | 291029456 | 10 | 4331  | chr01 | 745 | Chloroplast |
|  | GRMZM2G127147 | 122910609 | 122914067 | 7  | 3459  | chr06 | 843 | Chloroplast |
|  | GRMZM2G150906 | 12571385  | 12575346  | 2  | 3962  | chr03 | 790 | Chloroplast |
|  | GRMZM2G047292 | 139818315 | 139820635 | 8  | 2321  | chr02 | 491 | Chloroplast |

Table S3. Physicochemical characteristics of plant Rafs proteins.

| Species                        | Sequence ID               | Molecular weight (kDa) | Theoretical pI | Negatively/Positively charged residues (%) | Instability index | Grand average of hydropathicity (GRAVY) | Alpha helix (%) | Extended strand (%) | Beta turn (%) | Random coil (%) |
|--------------------------------|---------------------------|------------------------|----------------|--------------------------------------------|-------------------|-----------------------------------------|-----------------|---------------------|---------------|-----------------|
| <i>Brachypodium distachyon</i> | Bradi3g39220              | 82.44                  | 5.85           | 12.04/9.95                                 | 35.39             | −0.148                                  | 27.49           | 22.25               | 7.72          | 42.54           |
|                                | Bradi1g54210              | 82.77                  | 5.69           | 11.58/9.34                                 | 81.33             | −0.135                                  | 28.42           | 22.76               | 7.76          | 41.05           |
|                                | Bradi1g48050              | 89.36                  | 6.51           | 10.79/10.08                                | 83.46             | −0.041                                  | 27.88           | 22.18               | 7.00          | 42.94           |
|                                | Bradi5g13570              | 88.69                  | 5.7            | 11.02/9.18                                 | 85.30             | −0.091                                  | 27.17           | 21.66               | 7.47          | 43.70           |
|                                | Bradi2g04310              | 84.26                  | 5.7            | 11.51/8.82                                 | 85.77             | −0.008                                  | 27.11           | 22.12               | 5.88          | 44.88           |
| <i>Brachypodium stacei</i>     | Brast03G265700            | 81.83                  | 6.18           | 11.46/10.01                                | 80.82             | −0.155                                  | 26.61           | 22.27               | 6.59          | 44.53           |
|                                | Brast06G177200            | 82.73                  | 5.56           | 11.80/9.04                                 | 81.66             | −0.127                                  | 27.13           | 21.89               | 7.86          | 43.12           |
|                                | Brast07G049600            | 88.67                  | 6.79           | 10.62/10.26                                | 82.26             | −0.06                                   | 29.24           | 20.05               | 7.64          | 43.08           |
|                                | Brast09G120600            | 89.89                  | 5.66           | 10.90/8.84                                 | 83.29             | −0.127                                  | 28.57           | 20.22               | 6.54          | 44.67           |
|                                | Brast01G370300            | 84.77                  | 5.85           | 10.84/8.83                                 | 84.14             | 0.001                                   | 27.87           | 21.94               | 7.19          | 43.00           |
| <i>Oryza sativa</i>            | LOC_Os08g38710            | 81.54                  | 5.9            | 11.02/8.90                                 | 83.12             | −0.105                                  | 27.49           | 22.31               | 7.30          | 42.90           |
|                                | LOC_Os07g10840            | 82.01                  | 5.45           | 12.06/8.91                                 | 81.07             | −0.082                                  | 29.49           | 21.10               | 7.47          | 41.94           |
|                                | LOC_Os06g07600            | 89.67                  | 6.78           | 10.11/9.75                                 | 82.95             | −0.036                                  | 26.99           | 20.69               | 6.66          | 45.66           |
|                                | LOC_Os04g40520            | 81.19                  | 5.30           | 12.20/8.94                                 | 84.43             | −0.111                                  | 30.35           | 22.09               | 7.18          | 40.38           |
|                                | LOC_Os03g59430            | 54.91                  | 5.55           | 11.09/7.92                                 | 82.12             | −0.032                                  | 36.04           | 16.83               | 5.54          | 41.58           |
|                                | LOC_Os01g07530            | 91.92                  | 6.26           | 11.55/10.48                                | 80.45             | −0.13                                   | 27.26           | 22.26               | 6.31          | 44.17           |
| <i>Oropetium thomaeum</i>      | Oropetium_20150105_20308A | 87.26                  | 6.24           | 10.93/9.67                                 | 85.20             | −0.134                                  | 27.51           | 22.36               | 5.90          | 44.22           |
|                                | Oropetium_20150105_26753A | 84.37                  | *              | 12.18/9.74                                 | 79.23             | −0.2                                    | 29.23           | 21.41               | 6.54          | 42.82           |
|                                | Oropetium_20150105_17382A | 81.59                  | 5.89           | 11.27/9.44                                 | 84.64             | −0.048                                  | 28.57           | 21.36               | 7.21          | 42.86           |

|                                |                           |       |      |             |       |        |       |       |      |       |
|--------------------------------|---------------------------|-------|------|-------------|-------|--------|-------|-------|------|-------|
|                                | Oropetium_20150105_17380A | 79.97 | 6.04 | 10.37/9.04  | 85.49 | 0.043  | 27.79 | 23.01 | 7.98 | 41.22 |
|                                | Oropetium_20150105_04775A | 70.24 | *    | 10.67/8.43  | 65.24 | -0.157 | 29.12 | 22.40 | 7.51 | 40.97 |
|                                | Oropetium_20150105_07232A | 85.48 | 6.06 | 12.12/10.71 | 79.95 | -0.12  | 27.04 | 22.96 | 6.38 | 43.62 |
| <i><b>Panicum hallii</b></i>   | Pahal.6G249100            | 82.31 | 6.15 | 11.02/9.56  | 82.03 | -0.163 | 28.55 | 22.18 | 6.77 | 42.50 |
|                                | Pahal.9G040600            | 83.55 | 5.89 | 11.75/9.53  | 80.22 | -0.173 | 28.85 | 21.54 | 7.05 | 42.56 |
|                                | Pahal.2G094000            | 82.38 | 5.58 | 12.08/8.96  | 80.35 | -0.119 | 27.27 | 21.95 | 8.31 | 42.47 |
|                                | Pahal.4G310000            | 91.63 | 6.73 | 10.08/9.73  | 81.07 | -0.073 | 26.88 | 21.78 | 6.72 | 44.61 |
|                                | Pahal.4G309700            | 81.18 | 5.59 | 11.65/9.16  | 82.53 | -0.021 | 28.93 | 21.47 | 7.33 | 42.28 |
|                                | Pahal.7G192100            | 89.1  | 6.22 | 11.17/9.93  | 82.67 | -0.163 | 29.78 | 21.71 | 7.57 | 40.94 |
|                                | Pahal.5G489000            | 85.31 | 5.87 | 11.70/9.92  | 81.26 | -0.098 | 27.23 | 21.25 | 6.87 | 44.66 |
| <i><b>Panicum virgatum</b></i> | Pavir.6KG336200           | 82.09 | 6.3  | 11.04/9.97  | 82.14 | -0.168 | 27.39 | 22.07 | 7.18 | 43.35 |
|                                | Pavir.6KG338200           | 82.13 | 6.23 | 11.02/9.83  | 82.03 | -0.159 | 28.02 | 23.24 | 6.91 | 41.83 |
|                                | Pavir.3NG191300           | 82.14 | 6.09 | 11.16/9.56  | 82.55 | -0.161 | 26.96 | 22.44 | 7.44 | 43.16 |
|                                | Pavir.7NG251200           | 83.03 | 5.84 | 11.97/9.74  | 81.63 | -0.155 | 27.37 | 22.11 | 6.58 | 43.95 |
|                                | Pavir.9NG061500           | 82.8  | 5.76 | 11.70/9.33  | 81.02 | -0.161 | 27.33 | 22.08 | 7.36 | 43.23 |
|                                | Pavir.2NG127100           | 81.12 | 5.86 | 11.36/9.38  | 81.45 | -0.051 | 27.61 | 22.99 | 7.00 | 42.40 |
|                                | Pavir.4KG067600           | 92.69 | 6.88 | 9.99/9.76   | 80.68 | -0.098 | 25.03 | 21.13 | 6.77 | 47.07 |
|                                | Pavir.4KG086000           | 81.43 | 5.62 | 11.47/9.26  | 84.11 | -0.006 | 26.86 | 22.56 | 7.30 | 43.29 |
|                                | Pavir.2KG440200           | 64    | 6.49 | 11.09/10.25 | 75.61 | -0.204 | 34.45 | 17.98 | 5.21 | 42.35 |
|                                | Pavir.7KG206700           | 88.47 | 6.31 | 11.36/10.36 | 83.56 | -0.183 | 29.34 | 20.85 | 6.87 | 42.95 |
|                                | Pavir.7NG230500           | 84.34 | 5.67 | 11.73/9.26  | 84.59 | -0.156 | 27.77 | 21.64 | 7.04 | 43.55 |
|                                | Pavir.4KG068000           | 69.67 | 9.68 | 10.58/13.22 | 73.95 | -0.368 | 33.75 | 16.95 | 7.47 | 41.84 |
|                                | Pavir.5KG072800           | 85.12 | 6.08 | 11.46/10.06 | 80.74 | -0.089 | 28.54 | 22.17 | 6.11 | 43.18 |
|                                | Pavir.5NG075200           | 85.05 | 6.12 | 11.48/10.20 | 84.20 | -0.05  | 27.17 | 21.05 | 7.02 | 44.77 |



|                        |                  |       |      |             |       |        |       |       |      |       |
|------------------------|------------------|-------|------|-------------|-------|--------|-------|-------|------|-------|
|                        | Pavir.5NG070900  | 85.16 | 6.12 | 11.48/10.20 | 84.06 | −0.056 | 27.55 | 21.17 | 7.14 | 44.13 |
|                        | Pavir.J666000    | 44.06 | 6.21 | 10.49/8.78  | 88.71 | −0.047 | 23.90 | 24.63 | 7.56 | 43.90 |
| <i>Setaria italica</i> | Seita.6G195300   | 82.27 | 6.01 | 11.29/9.43  | 82.93 | −0.15  | 27.22 | 22.05 | 7.57 | 43.16 |
|                        | Seita.9G043300   | 83.38 | 5.63 | 14.36/10.97 | 81.92 | −0.11  | 27.15 | 22.32 | 7.31 | 43.21 |
|                        | Seita.2G081000   | 83.03 | 5.74 | 11.81/9.50  | 78.41 | −0.134 | 29.40 | 21.57 | 9.50 | 39.54 |
|                        | Seita.4G057000   | 91.78 | 6.63 | 10.32/9.86  | 82.87 | −0.071 | 27.03 | 21.23 | 6.38 | 45.36 |
|                        | Seita.4G056900   | 81.43 | 5.59 | 11.37/8.63  | 83.93 | 0.009  | 28.89 | 21.57 | 7.06 | 42.48 |
|                        | Seita.7G139800   | 97.51 | 6.76 | 11.10/10.76 | 79.99 | −0.254 | 25.93 | 19.93 | 7.81 | 46.32 |
|                        | Seita.5G119800   | 85.12 | 5.85 | 11.89/9.97  | 80.68 | −0.095 | 27.49 | 20.72 | 6.01 | 45.78 |
| <i>Setaria viridis</i> | Sevir.6G202600   | 82.28 | 6.01 | 11.29/9.43  | 82.30 | −0.163 | 27.49 | 22.58 | 7.44 | 42.50 |
|                        | Sevir.9G042600   | 83.39 | 5.63 | 12.01/9.40  | 80.97 | −0.157 | 27.42 | 21.54 | 7.05 | 43.99 |
|                        | Sevir.2G084500   | 83.03 | 5.69 | 11.94/9.50  | 78.41 | −0.134 | 29.27 | 20.92 | 8.86 | 40.95 |
|                        | Sevir.4G054800   | 91.92 | 6.53 | 10.44/9.86  | 83.20 | −0.074 | 27.15 | 21.35 | 6.61 | 44.90 |
|                        | Sevir.4G054700   | 81.37 | 5.51 | 11.52/8.64  | 83.66 | 0.001  | 27.75 | 21.20 | 6.68 | 44.37 |
|                        | Sevir.7G148900   | 97.36 | 6.66 | 11.11/10.66 | 80.52 | −0.247 | 26.87 | 19.50 | 7.14 | 46.49 |
|                        | Sevir.5G116500   | 85.13 | 5.85 | 11.89/9.97  | 80.55 | −0.097 | 25.45 | 20.97 | 6.39 | 47.19 |
| <i>Sorghum bicolor</i> | Sobic.007G219900 | 82.36 | 6.1  | 11.01/9.55  | 80.89 | −0.187 | 28.12 | 23.08 | 7.43 | 41.38 |
|                        | Sobic.001G044800 | 83.73 | 5.85 | 11.77/9.70  | 78.95 | −0.18  | 28.46 | 21.09 | 6.73 | 43.73 |
|                        | Sobic.002G075800 | 82.34 | 6.03 | 11.52/9.82  | 79.92 | −0.135 | 25.92 | 22.51 | 7.46 | 44.11 |
|                        | Sobic.010G057300 | 91.23 | 6.51 | 10.50/9.92  | 82.21 | −0.071 | 26.84 | 20.89 | 6.65 | 45.62 |
|                        | Sobic.010G057400 | 78.64 | 6.07 | 10.57/9.21  | 84.63 | 0.018  | 29.54 | 21.41 | 7.45 | 41.60 |
|                        | Sobic.006G122400 | 89.3  | 5.86 | 11.60/9.75  | 86.00 | −0.124 | 28.52 | 21.11 | 7.53 | 42.84 |
|                        | Sobic.003G052300 | 85.98 | 5.8  | 11.87/9.85  | 80.90 | −0.095 | 25.25 | 21.46 | 5.93 | 47.35 |
|                        | GRMZM2G037265    | 81.17 | 6.59 | 10.44/9.77  | 82.45 | −0.146 | 26.77 | 23.03 | 7.23 | 42.97 |

|                                   |               |        |      |             |       |        |       |       |      |       |
|-----------------------------------|---------------|--------|------|-------------|-------|--------|-------|-------|------|-------|
| <i>Zea mays</i><br><i>Ensembl</i> | GRMZM2G050177 | 100.38 | 6.65 | 10.74/10.20 | 80.65 | −0.196 | 26.14 | 22.89 | 8.79 | 42.19 |
|                                   | GRMZM2G340656 | 81.93  | 5.95 | 11.51/9.52  | 80.99 | −0.13  | 29.50 | 22.22 | 7.80 | 40.48 |
|                                   | GRMZM2G077181 | 80.85  | 5.93 | 11.41/9.40  | 80.36 | −0.125 | 27.79 | 21.88 | 6.98 | 43.36 |
|                                   | GRMZM2G127147 | 90.61  | 6.12 | 11.15/9.96  | 84.26 | −0.079 | 28.47 | 21.23 | 7.83 | 42.47 |
|                                   | GRMZM2G150906 | 85.59  | 5.86 | 11.77/9.75  | 81.95 | −0.082 | 26.58 | 20.63 | 6.33 | 46.46 |
|                                   | GRMZM2G047292 | 54.09  | 8.23 | 10.79/11.41 | 86.21 | −0.161 | 36.05 | 15.07 | 6.72 | 42.16 |

Table S4. qRT-PCR primer information of switchgrass *Rafs* gene

| Gene ID           | Gene name | Primer sequence (5'- 3')   | Primer fragment (bp) |
|-------------------|-----------|----------------------------|----------------------|
| Pavir.6KG336200.1 | Rafs1.1-F | ACCTTGTCATGATGAGCAGCC      | 22                   |
|                   | Rafs1.1-R | CTCTCCTCCGACGTGCGAATA      | 21                   |
| Pavir.6KG336200.2 | Rafs1.2-F | ACCTTGTCATGATGAGCAGCC      | 22                   |
|                   | Rafs1.2-R | GCAGAAATGATGATTTACCTCCGAC  | 25                   |
| Pavir.6KG338200.1 | Rafs2.1-F | ATCTTGCACTGTGCTGGGATCGA    | 22                   |
|                   | Rafs2.1-R | TCTCCTCCGACGTGCGAATA       | 22                   |
| Pavir.6KG338200.2 | Rafs2.2-F | AAGAACCTTGTCATGATGAGCAG    | 24                   |
|                   | Rafs2.2-R | TATGGACAGCAGATTGCTTGTCAT   | 24                   |
| Pavir.6KG338200.3 | Rafs2.3-F | GGTGTGTTGGAATGGAGCAATA     | 23                   |
|                   | Rafs2.3-R | AGCACCTAGTGTCTCAAGGATGTTT  | 25                   |
| Pavir.3NG191300.1 | Rafs3.1-F | CGGGTAGGGAAGAAGAACCTTGTT   | 24                   |
|                   | Rafs3.1-R | CACCTCTCCTCCTACGTGCGAAT    | 23                   |
| Pavir.3NG191300.2 | Rafs3.2-F | CGGGTAGGGAAGAAGAACCTTGTT   | 24                   |
|                   | Rafs3.2-R | TTAATGACAAGCAATCTGCTGTCCA  | 25                   |
| Pavir.7NG251200   | Rafs4-F   | AGTTCACCTACGACGCCGACA      | 21                   |
|                   | Rafs4-R   | TCCACCAAAGAATGAGGCGAG      | 21                   |
| Pavir.9NG061500.1 | Rafs5.1-F | GCAGCAGATCGGCAGCGAGAACAA   | 24                   |
|                   | Rafs5.1-R | TCTGCTGCTGCTCTGCCTCCTCCTT  | 25                   |
| Pavir.9NG061500.2 | Rafs5.2-F | GCAGCAGATCGGCAGCGAGAACAA   | 24                   |
|                   | Rafs5.2-R | CGCGCTTCGCCTCCTCCTTCTTGTT  | 25                   |
| Pavir.9NG061500.3 | Rafs5.3-F | TGTAGCAGAAATGCTCGGTTCTGA   | 24                   |
|                   | Rafs5.3-R | TTGTCCCTGTGGTGGAACGTC      | 21                   |
| Pavir.9NG061500.4 | Rafs5.4-F | CACTCACGTACGTTCTGAACTTT    | 25                   |
|                   | Rafs5.4-R | CATTGGCCTCCTCCTTGTTCTC     | 22                   |
| Pavir.2NG127100   | Rafs6-F   | AGATCACGGTGTAGGCCGAGA      | 21                   |
|                   | Rafs6-R   | AGGCACATCACAATCACCTCA      | 22                   |
| Pavir.4KG067600   | Rafs7-F   | CCCAAGGAGAGGGTTCACAAGAT    | 23                   |
|                   | Rafs7-R   | TCCAGTCCCTACCATCAACATGC    | 23                   |
| Pavir.4KG086000   | Rafs8-F   | TCGGCTGAGATCGAGTTCTCCTA    | 23                   |
|                   | Rafs8-R   | ACCGCACCGCAAGTCTACAACT     | 22                   |
| Pavir.2KG440200   | Rafs9-F   | ATTCTCAGCCGTCGCCATTG       | 20                   |
|                   | Rafs9-R   | ACACCACAGTGGCATAGCAAAGC    | 23                   |
| Pavir.7KG206700   | Rafs10-F  | CAGTCATACAGAGGATGGCCTGC    | 23                   |
|                   | Rafs10-R  | AATGGCAGGAAATCGCCTGTT      | 21                   |
| Pavir.7NG230500   | Rafs11-F  | GCCATTGTTTCAAGTTGGTTCTGATG | 24                   |
|                   | Rafs11-R  | ATCGTGACAGAATTGGCGCTG      | 21                   |
| Pavir.4KG068000   | Rafs12-F  | AGCATCAGCAATCCAGAACACCA    | 23                   |
|                   | Rafs12-R  | AGGCATCAGTTCATATCGCCGA     | 22                   |
| Pavir.5KG072800   | Rafs13-F  | GTTTCGCCTACAAGGACGGCAT     | 21                   |
|                   | Rafs13-R  | ACGGACTGATAGGCGAATGCAC     | 22                   |
| Pavir.5NG075200   | Rafs14-F  | TTCGCCTACAAGGACGGCTTG      | 21                   |

|                 |          |                          |    |
|-----------------|----------|--------------------------|----|
|                 | Rafs14-R | AGCCTGATAGGCGAATGTGACGT  | 23 |
| Pavir.5NG070900 | Rafs15-F | GTTCGCCTACAAGGACGGCTT    | 21 |
|                 | Rafs15-R | AGCCTGATAGGCGAATGTGACG   | 22 |
| Pavir.J666000   | Rafs16-F | CGGATTGGTGTGCATGGAAGT    | 21 |
|                 | Rafs16-R | ATCTTGTGAACCCTCTCCTTGGG  | 23 |
|                 | Actin-F  | AGCAGCATGAAGATCAAGGTGGTT | 24 |
|                 | Actin-R  | CGGACTCATCGTACTCAGCCTTG  | 23 |

Table S5. Primers used to construct the *UBI::PvRafs-GFP* vector.

| Gene ID           | Gene name   | Primer sequence                       | Primer fragment (bp) |
|-------------------|-------------|---------------------------------------|----------------------|
| Pavir.9NG061500.1 | PVRafs5.1-F | ATGACGGTGACGCCGAAGATCACG              | 24                   |
|                   | PvRafs5.1-R | CCATCTGTAGAACTCCTTCTCCGGCAC           | 27                   |
| Pavir.9NG061500.2 | PvRafs5.2-F | ATGACGGTGACGCCGAAGATCACGG             | 25                   |
|                   | PvRafs5.2-R | GACCTGGATCTCCAGGTTCCATCTGTACAACTCC    | 34                   |
| Pavir.9NG061500.3 | PvRafs5.3-F | ATGGACAGGGTTGTGGAGAGGCACCT            | 26                   |
|                   | PvRafs5.3-R | GACCTGGATCTCCAGGTTCCATCTGTACAACTCCT   | 35                   |
| Pavir.9NG061500.4 | PvRafs5.4-F | ATGGCGGGGTACTGGGGCGG                  | 20                   |
|                   | PvRafs5.4-R | GACCTGGATCTCCAGGTTCCATCTGTACAACTCCTGC | 37                   |
